# Supplementary material
Source: PubMed Central journal article supplement (PMC3152642)
Supplement: NIHMS294629-supplement-03.pdf [file NIHMS294629-supplement-03.pdf]

**Table 1****Table 1. PCR primers conditions used for amplification and expected sizes of PCR products**

| Protein<br>GenBank#                | Sense (5' → 3')/<br>Nucleotides    | Antisense (5' → 3')/<br>Nucleotides | Annealing<br>Temp.(°C) | Product<br>(bp) |
|------------------------------------|------------------------------------|-------------------------------------|------------------------|-----------------|
| Hand2<br><i>AK035160</i>           | TACCAGCTACATCGCCTACCT<br>1358-1378 | TCACTGCTTGAGCTCCAGGG<br>1582-1561   | 55                     | 225             |
| β-actin<br><i>NM_007393(Mouse)</i> | TGTTTGAGACCTTCAACAC<br>447-466     | CAGTAATCTCCTTCTGCATCC<br>1034-1014  | 58                     | 588             |
| HuB<br><i>BC058393(Mouse)</i>      | TGGGTTACGGATTTGTGA<br>522-541      | ACCCTACACCCCTTGA<br>792-776         | 58                     | 271             |
| HuC<br><i>BC052097(Mouse)</i>      | AGTTGGTTCGGGATAAGA<br>618-635      | CTGACTTGGGTTGTTTGC<br>1036-1019     | 58                     | 418             |
| HuD<br><i>BC051987(Mouse)</i>      | TAAAGGTGTCCTACGCCC<br>377-394      | AACTTCACAGTAATCGGTT<br>653-635      | 58                     | 276             |
