# Supplementary material
Source: PubMed Central journal article supplement (PMC3152642)

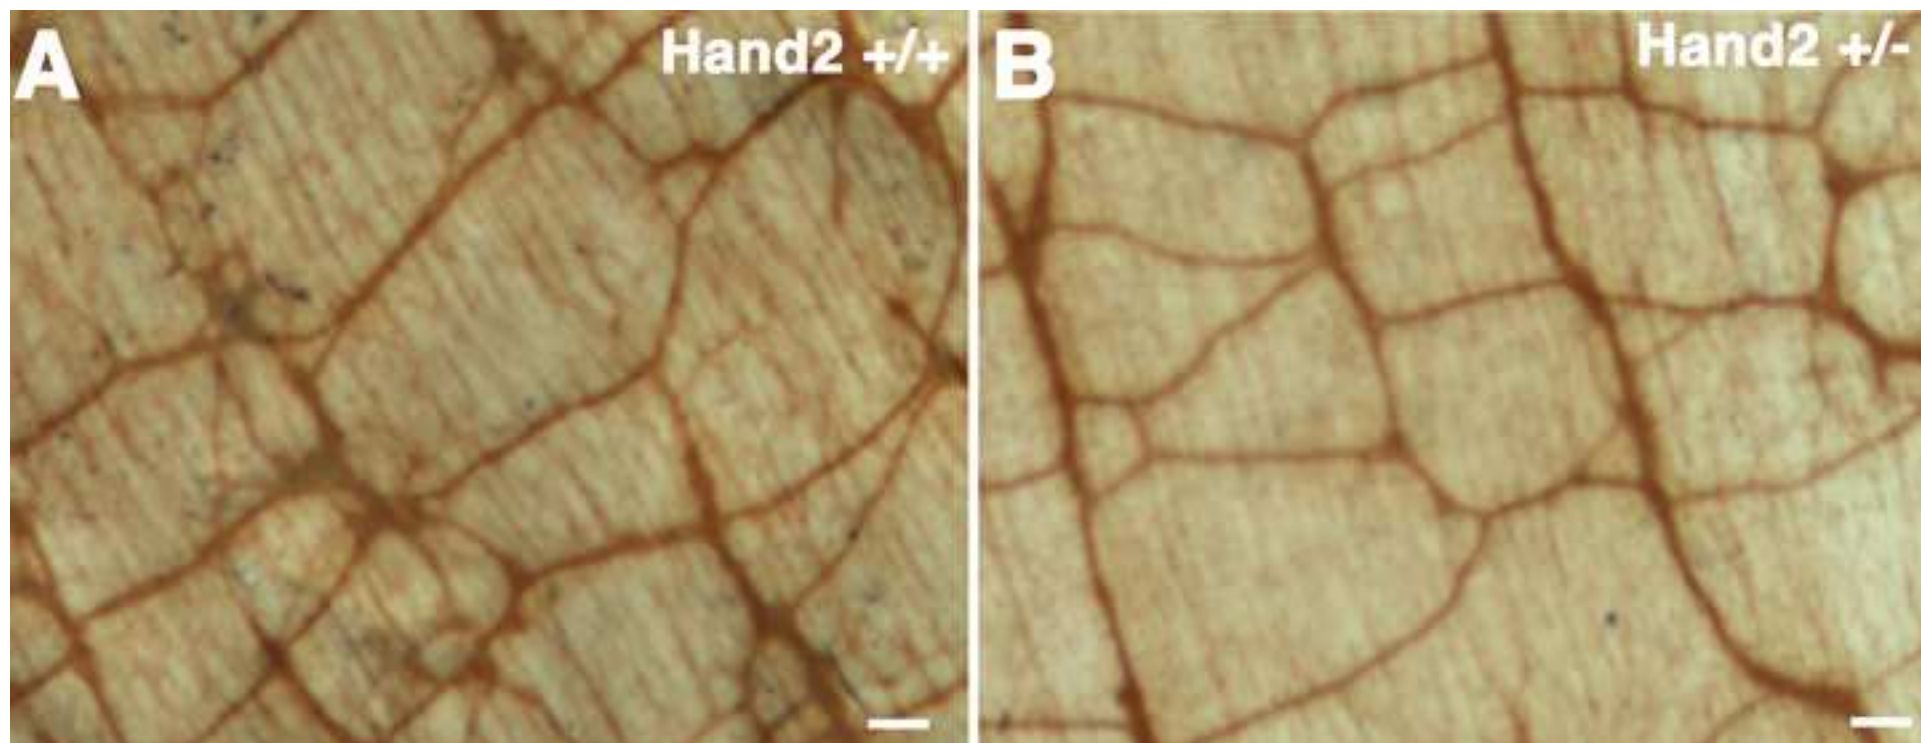

Supplement: NIHMS294629-supplement-04.pdf [file NIHMS294629-supplement-04.pdf]

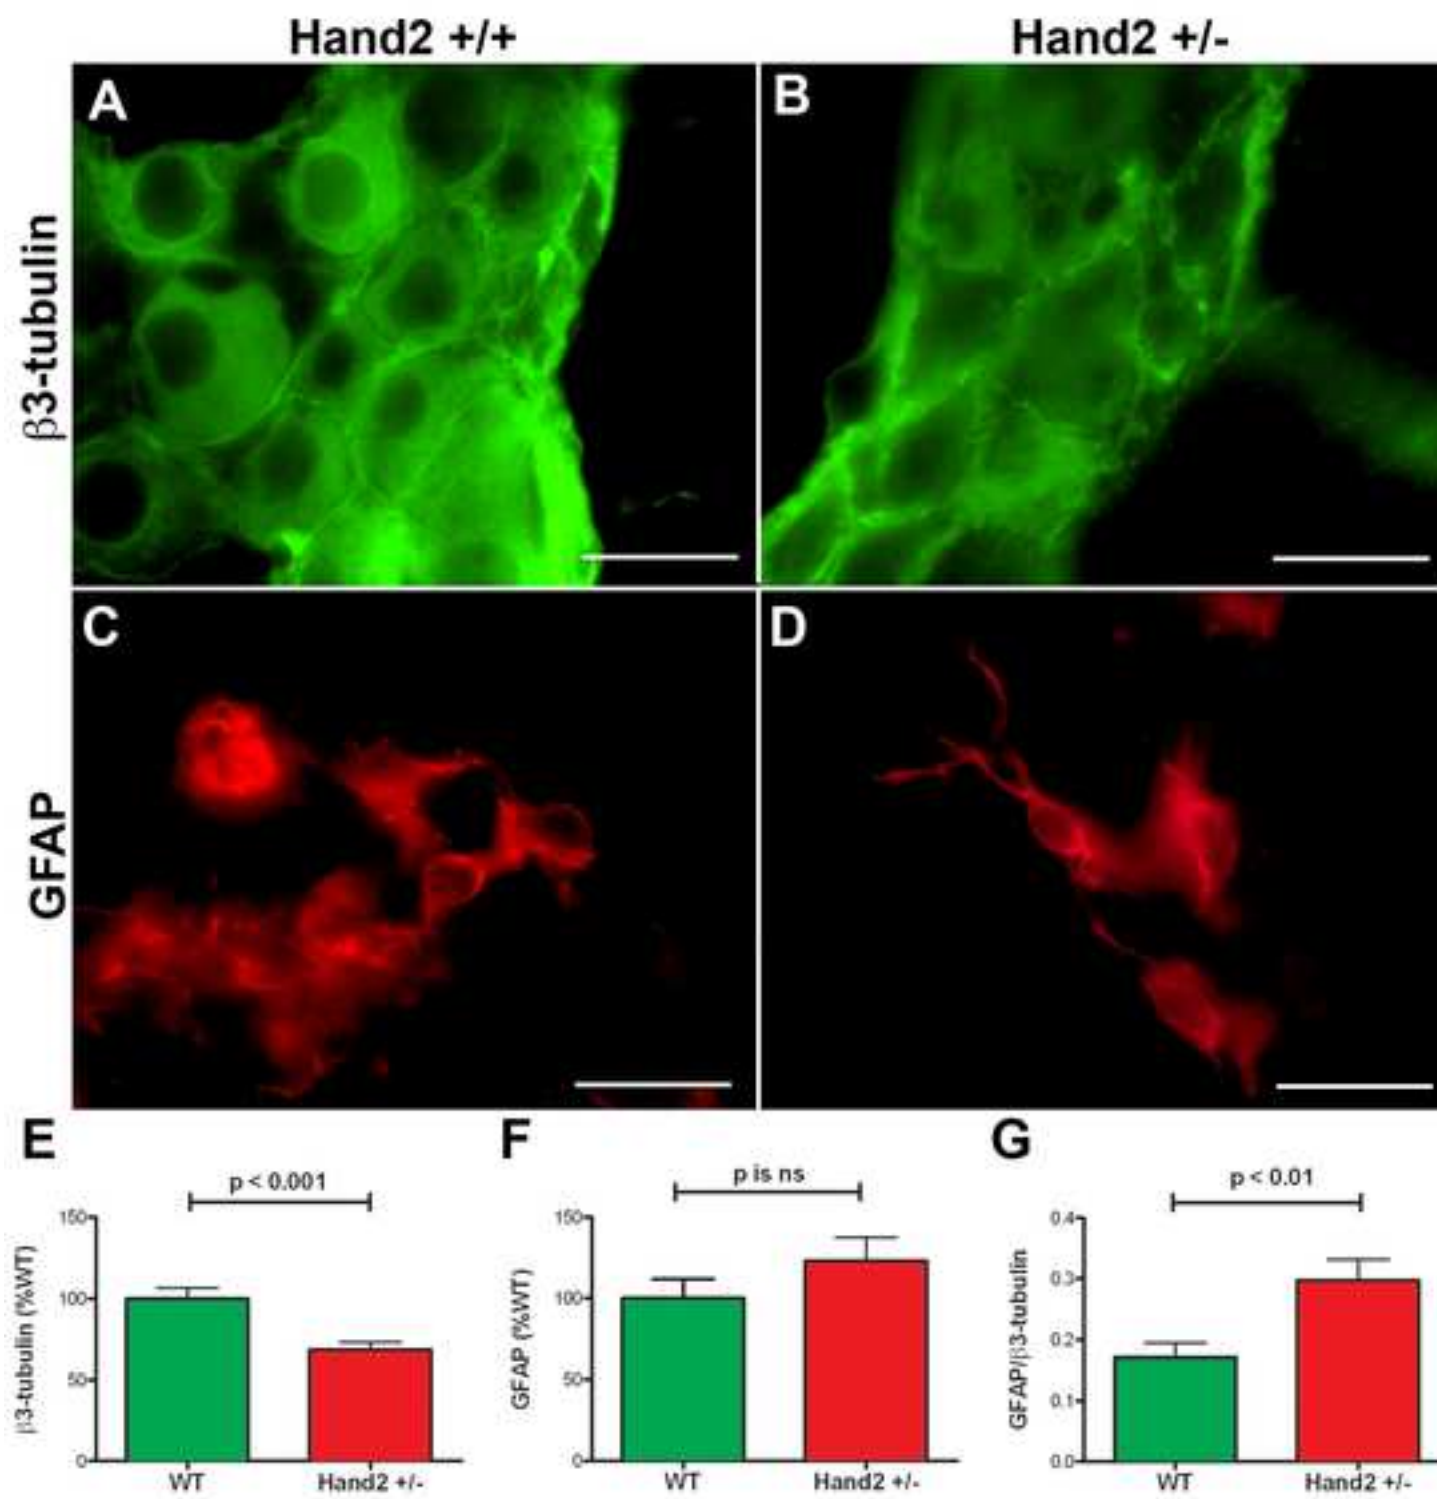

Supplement: NIHMS294629-supplement-05.pdf [file NIHMS294629-supplement-05.pdf]

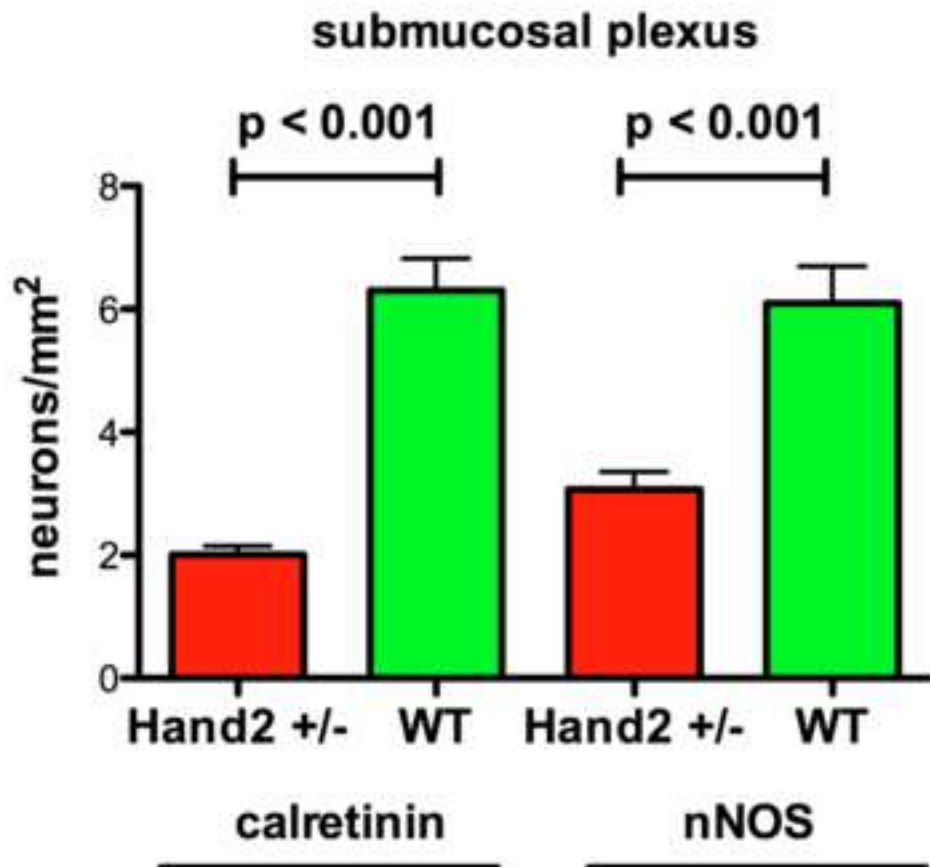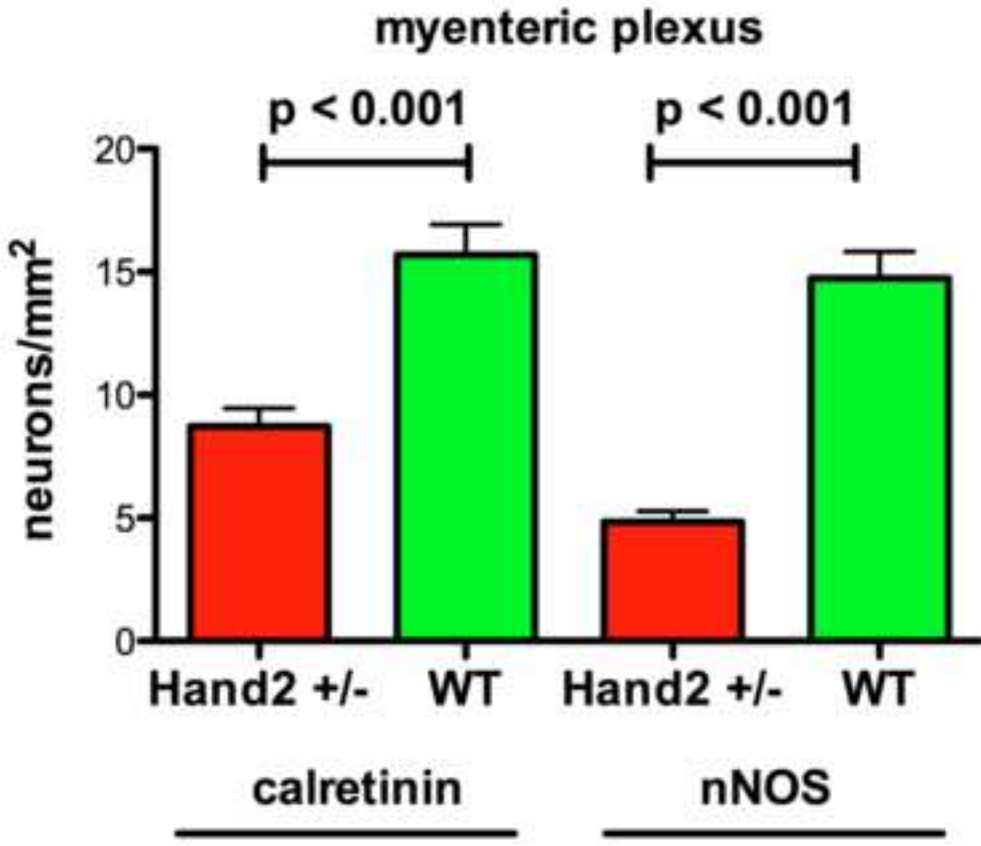

Supplement: NIHMS294629-supplement-06.pdf [file NIHMS294629-supplement-06.pdf]

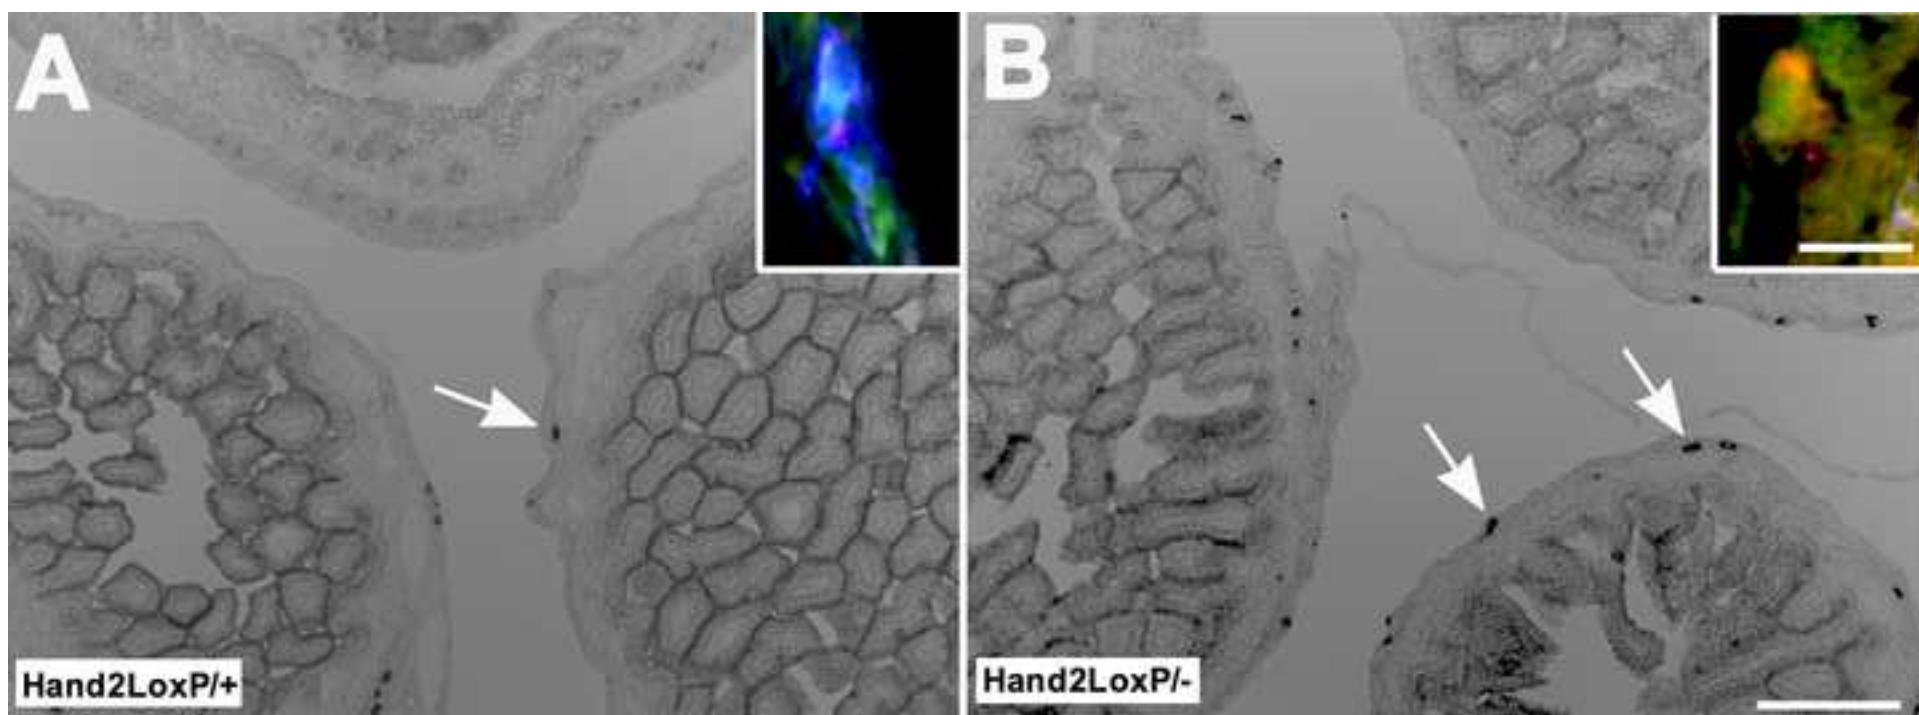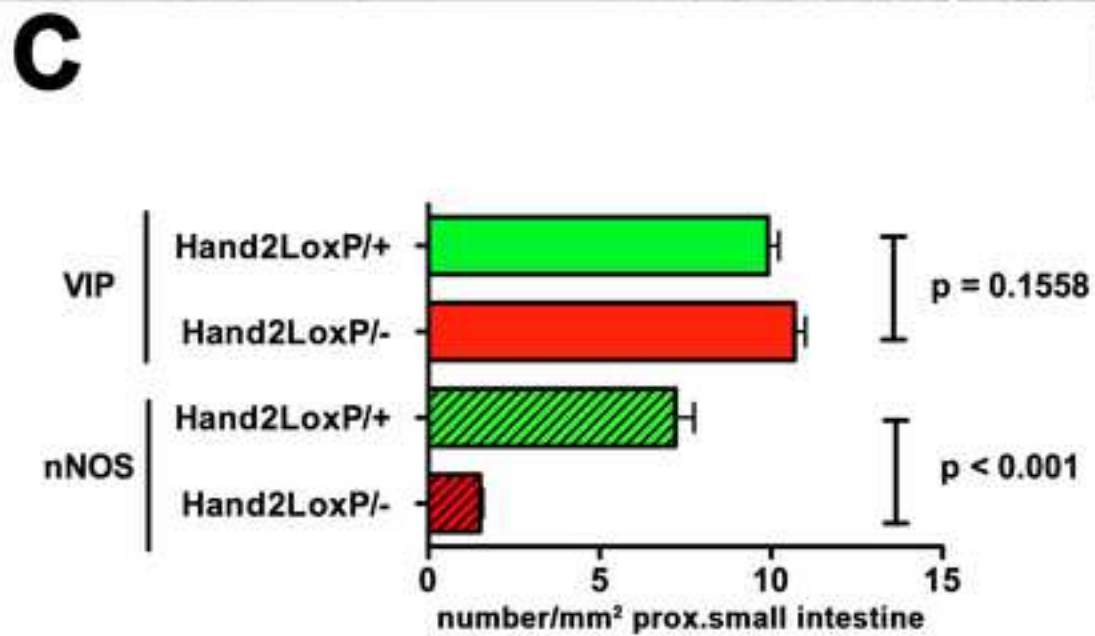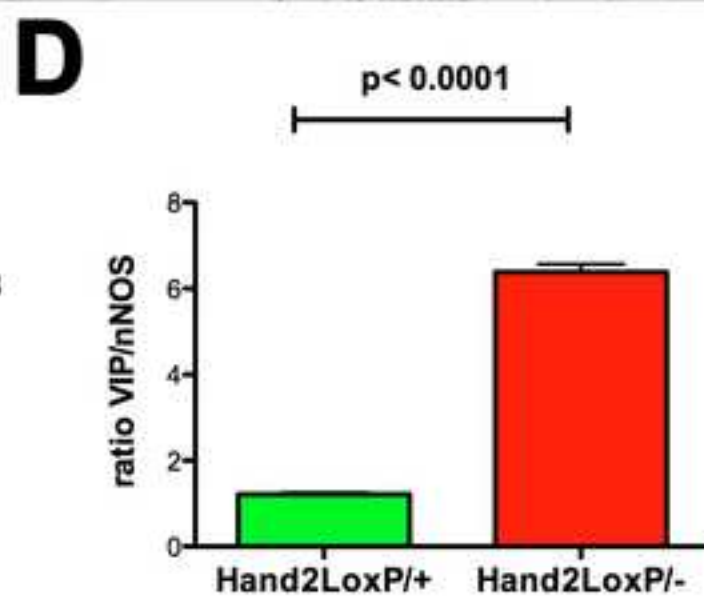

Supplement: NIHMS294629-supplement-07.pdf [file NIHMS294629-supplement-07.pdf]
